# Supplementary material for: Overexpression of ETV4 is oncogenic in prostate cells through promotion of both cell proliferation and epithelial to mesenchymal transition
Source: PubMed Central journal article supplement — Oncogenesis. 2012 Jul 16;1(7):e20–. doi: 10.1038/oncsis.2012.20 (PMC3412649; doi:10.1038/oncsis.2012.20), 2012-07-16
Supplement: oncsis201220x1.pdf [file oncsis201220x1.pdf]

## Supplementary Figure 1

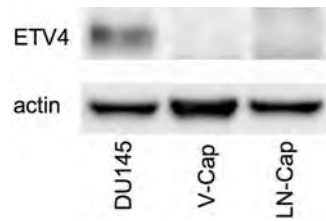

### Supplementary Figure 1.

*ETV4* western blot analysis of three human prostate cell lines: *DU145*, *V-Cap* and *LN-Cap*. The 54 kD *ETV4* band is present in the *DU145* cell line and not in the *V-Cap* and *LN-Cap* cell lines that express undetectable levels of *ETV4* mRNA.
